CORRECTION

# Correction: Host Factors and Biomarkers Associated with Poor Outcomes in Adults with Invasive Pneumococcal Disease

**Shigeo Hanada, Satoshi Iwata, Kazuma Kishi, Miyuki Morozumi, Naoko Chiba, Takeaki Wajima, Misako Takata, Kimiko Ubukata, The Invasive Pneumococcal Diseases Surveillance Study Group**

There is an error in the [Table 3](#). Within the column labeled “OR (95% CI)”, the values are incorrect for the row labeled “Non-vaccine serotypes”. The correct values are: 1.5 (0.8–3.0). Please see the corrected [Table 3](#) here.

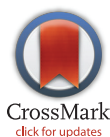

## OPEN ACCESS

**Citation:** Hanada S, Iwata S, Kishi K, Morozumi M, Chiba N, Wajima T, et al. (2016) Correction: Host Factors and Biomarkers Associated with Poor Outcomes in Adults with Invasive Pneumococcal Disease. PLoS ONE 11(3): e0153109. doi:10.1371/journal.pone.0153109

**Published:** March 31, 2016

**Copyright:** © 2016 Hanada et al. This is an open access article distributed under the terms of the [Creative Commons Attribution License](#), which permits unrestricted use, distribution, and reproduction in any medium, provided the original author and source are credited.

**Table 3. Risk factors associated with mortality within 28 days among patients with invasive pneumococcal disease by multivariate logistic regression analysis.**

| Characteristic                          | Survived (n = 384) | Died (n = 122) | Multivariate analysis <sup>e</sup> | p value <sup>f</sup> |
|-----------------------------------------|--------------------|----------------|------------------------------------|----------------------|
|                                         | n (%)              | n (%)          | OR (95% CI)                        |                      |
| <b>Age groups</b>                       |                    |                |                                    |                      |
| <50 y                                   | 45 (11.7)          | 5 (4.1)        | 1                                  | -                    |
| 50–64 y                                 | 87 (22.7)          | 18 (14.8)      | 1.6 (0.5–5.6)                      | NS                   |
| 65–79 y                                 | 155 (40.4)         | 51 (41.8)      | 3.0 (0.9–9.6)                      | NS                   |
| ≥80 y                                   | 97 (25.3)          | 48 (39.3)      | 6.5 (2.0–21.6)                     | .002                 |
| <b>Underlying disease</b>               |                    |                |                                    |                      |
| Liver disease <sup>a</sup>              | 33 (8.6)           | 17 (13.9)      | 3.5 (1.6–7.8)                      | .002                 |
| Lung disease <sup>b</sup>               | 34 (8.9)           | 4 (3.3)        | 0.4 (0.1–1.4)                      | NS                   |
| <b>Mechanical ventilation</b>           | 52 (13.5)          | 40 (32.8)      | 3.0 (1.7–5.6)                      | < .001               |
| <b>Laboratory findings <sup>c</sup></b> |                    |                |                                    |                      |
| WBC (<4.0×10 <sup>3</sup> cells/μL)     | 39 (10.2)          | 41 (33.6)      | 6.9 (3.7–12.8)                     | < .001               |
| Cr (≥2.0 mg/dL)                         | 46 (12.1)          | 44 (36.4)      | 4.5 (2.5–8.1)                      | < .001               |
| LDH (≥300 IU/L)                         | 118 (32.1)         | 61 (53.0)      | 2.4 (1.4–4.0)                      | .001                 |
| <b>Serotype <sup>d</sup></b>            |                    |                |                                    |                      |
| PCV7 serotypes                          | 139 (36.2)         | 44 (36.1)      | 1                                  | -                    |
| PCV13 and PPSV23 serotypes              | 182 (47.4)         | 50 (41.0)      | 0.8 (0.5–1.5)                      | NS                   |
| Non-vaccine serotypes                   | 60 (15.6)          | 20 (23.0)      | 1.5 (0.8–3.0)                      | NS                   |

<sup>a</sup> Includes chronic hepatitis or cirrhosis that was secondary to alcohol abuse or viral infection.

<sup>b</sup> Includes chronic obstructive pulmonary disease, bronchial asthma, interstitial lung disease, and bronchiectasis.

<sup>c</sup> Laboratory findings; WBC, white blood cell count; Cr, creatinine; LDH, lactate dehydrogenase.

<sup>d</sup> Serotype; PCV7, 7-valent pneumococcal conjugate vaccine; PCV13, 13-valent pneumococcal conjugate vaccine; PPSV23, 23-valent pneumococcal polysaccharide vaccine.

<sup>e</sup> Multivariate analysis; OR, odds ratio; CI, confidence interval.

<sup>f</sup> NS, not significant ( $p \geq .05$ ).

doi:10.1371/journal.pone.0153109.t001

## Reference

1. Hanada S, Iwata S, Kishi K, Morozumi M, Chiba N, Wajima T, et al. (2016) Host Factors and Biomarkers Associated with Poor Outcomes in Adults with Invasive Pneumococcal Disease. PLoS ONE 11(1): e0147877. doi:10.1371/journal.pone.0147877 PMID: 26815915
